# Supplementary material for: Ocean acidification disrupts the biomineralization process in the oyster Crassostrea virginica via intracellular calcium signaling dysregulation
Source: Research Square preprint supplement (doi:10.21203/rs.3.rs-7180529/v1), 2025-08-19
Supplement: Supplementary file 1 [file 5859df5ff295951ea5694d23.docx]

**Supplementary Data**

Table S1. Formulation of solutions and growth medium used in this study. * All balanced salt solutions and growth medium were adjusted with HCl and NaOH.

| Solution | Formulation | Reference |
| --- | --- | --- |
| Ca2+ and Mg2+ free artificial seawater solution (CMFSS) | 0.8 g/L KCL  25.5g/L NaCl  3.0 g/L Na2PO4  3.0 g/L D-Glucose (Dextrose) anhydrous,  2.86 g/L HEPES  pH = 7.7 | [1] |
| Oyster cell culture medium | Leibovitz’s L-15 Powder  NaCl 12.5 g/L  D-Glucose 6.24 g/L  MgSO4 3.16 g/L  KCl 0.344 g/L  NaHCO3 0.192 g/L  5.68 g/L MgCl2 • 6H2O  1.48 g/L CaCl2 • 2H2O  500 μL/L MEM non-essential amino acids  500 μL/L sodium pyruvate  1.75 g/L -tocopherol-acetate  1 mg/L Hydrocortisone  Insulin, Transferrin, and Sodium Selenit 500 μL/L  pH = 7.8 | [1] |

Table S2. Ocean acidification treatment groups across C. virginica larval stage transitions.

| Age of development | Treatment Hours | Developmental Stage | Density of larvae | Sample size per replicate |
| --- | --- | --- | --- | --- |
| 12 hours old | 24 | Trochophore stage | 20 oysters /ml | ~14,000 |
| 48 hours old | 48 | D-shaped stage | 20 oysters /ml | ~14,000 |
| 10 days old | 48 | Umbonal stage | 2.5 oysters /ml | ~1,750 |
| 20 days old | 48 | Pediveliger stage | 1.5 oysters /ml | ~1,050 |

Table S3. Candidate genes and related primers for qPCR analysis

| Target gene | Accession #  of *C. virginica* | Homologous species  (Accession #) | Identities (%) | E-value | Sequence | Reference |
| --- | --- | --- | --- | --- | --- | --- |
| *Cv-ef1α* | BG624869.1 | *C. virginica*  (BG624869.1) | 100 | 0 | F: 5’-ATCAACTTCCACTGGCCATC-3‘  R: 5’-TTTTCCCATCTCAGCTGCTT-3‘ | [2] |
| *Cv-CaM* | MG029431 | *C. virginica*  (MG029431) | 100 | 0 | F: 5’-ACAGATGAAGAGGTAGATGAAATGA-3‘  R: 5’-GCTATACAAGCAGTTGCCATTC-3‘ | [1] |
| *Cv-CaN* | XM_022461887 | *P. fucata*  (EU797510) | 99 | 0 | F: 5’-TTGCTCACTCACCCTTAATCTG-3’  R: 5’-GCTGTGCTGCTTTCCATTTC-3’ | [3] |
| *Cv-Nacrein* | XM_022487278.1 | *P. fucata*  (BAA11940.1) | 31.33 | 3e-42 | F: 5’-GATGATACTGAGGAGGCCAAAG-3’  R: 5’-GTCCACAACATTCTCTGGTATAGG-3’ | [4] |
| *Cv-Pif97* | XM_022443581 | *M. gigas*  (AFT63505.1) | 72.46 | 0 | F: 5’-AGACCTTAAGATTTGCCCAGATAG-3’  R: 5’-CGACTCCAGGCATCATACATT-3’ | [5] |
| *Cv-Tyr* | XM_022479257.1 | *M. gigas*  (AGZ15753.1) | 91.95 | 0 | F: 5’-GGGACCATTCGCTCGATTTA-3’  R: 5’-GTAGCCGTCGATGTAGTTATGG-3’ | [6] |
| *Cv-Chits* | XM_022473493 | *A. rigida*  (AAY86556.1) | 46.61 | 0 | F: 5’-CCGGGTGTTTCAGTTTGTTTAG-3’  R: 5’-GAATGTTTCGGGTGCATGTG-3’ | [7] |

Figure S1.(A) The setup for testing oyster larvae development under simulated ocean acidification at the lab condition. Four replicate beakers will be used for sample collection for morphology and qPCR analyses. (B) A treatment group of oyster larvae under a mimic acidification environment in a glove box. Ocean acidification condition = 1000150 ppm atmospheric CO2 concentration and control = 425150 ppm atmospheric CO2 concentration. (C) Light micrographs of C. virginica larvae incubated for 12 hours (trochophore stage), 48 hours (D-shape stage), 10 days (umbonal stage), and 20 days (pediveliger or eyed larvae). White arrow: “Eye” of eyed larvae. During the trochophore stage, the oyster embryo develops a hair-like structure called “cilia”, enabling its locomotion in the water column. In the D-shaped stage, a two-shell structure and an organ for movement and feeding begin to form. Subsequently, in the umbonal stage, the oyster larvae develop a hinge between the two shells. Following the umbonal stage, a locomotion-related structure will shortly be developed in preparation for permanent attachment to a hard surface in the pediveliger stage [8–10]. (D) Changes in filtered seawater pH for C. virginica larval development between Control and acidification treatment group. *P < 0.05.

Figure S2. Crassostrea virginica specific PCR primers for genetic markers were analyzed with qPCR and PAGE-TBE gel electrophoresis. PCR products of Cv-ef1, Cv-Nacrein, Cv-CaM, Cv-Tyr, Cv-CaN, Cv-Pif97, and Cv-Chits were detected in C. virginica mantle cells. M: DNA marker.

Figure S3. Cell population within different preparations in primary mantle cell culture of C. virginica. (A) Dissociated mantle cells yield from collagenase alone. A large mixture of fibroblast- and epithelial-like cells. (B) Mantle explant culture without collagenase treatment. Fibroblast-like cells migrated from the explant. (C) Collagenase-treated explant. Most of the migrated cell shapes are closed to the epithelial cells. Black arrow: Fibroblast-like cell. White arrow: Epithelial-like cell. White bar: 100 m.

Figure S4. OA condition alters early development of D-shape oyster larvae. (A) Representative image of a normally developed D-shaped shell at 36 hours post-fertilization in the control group. (B–C) Abnormal D-shaped shells observed at 36 hours post-fertilization under OA conditions, characterized by a protruding mantle along the shell margin (B) and a “concave” shell hinge (C). Yellow arrow: shell deformities. White scale bar: 100 μm.


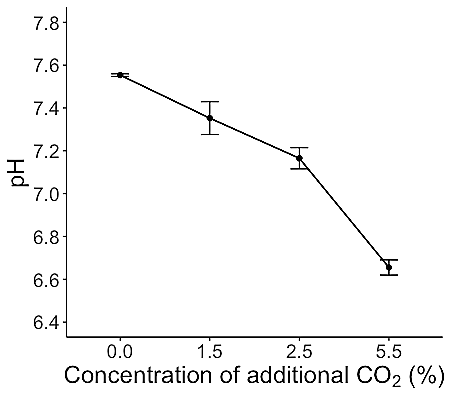


Figure S5. Changes of oyster cell culture medium pH in response to increased atmospheric CO2 after 48 hours (n = 3-6 culture flasks)

Figure S6. Expression of Ca2+/CaM dependent protein kinase II (CaMKII) in C. virginica mantel cells among treatment groups of 0.1% DMSO, Control, 1.5% CO2 exposure, and 25 M W-7 at mRNA level (n = 8 oysters). The significant difference between the two groups (P < 0.05) was demonstrated by different letters over the column.

**Reference**

1. Richards M, Xu W, Mallozzi A, Errera RM, Supan J. Production of Calcium-Binding Proteins in Crassostrea virginica in Response to Increased Environmental CO2 Concentration. Frontiers in Marine Science. 2018;5. Available: https://www.frontiersin.org/article/10.3389/fmars.2018.00203

2. Xue Q, Gauthier J, Schey K, Li Y, Cooper R, Anderson R, et al. Identification of a novel metal binding protein, segon, in plasma of the eastern oyster, *Crassostrea virginica*. Comparative Biochemistry and Physiology Part B: Biochemistry and Molecular Biology. 2012;163: 74–85. doi:10.1016/j.cbpb.2012.05.002

3. Li C, Huang J, Li S, Fan W, Hu Y, Wang Q, et al. Cloning, characterization and immunolocalization of two subunits of calcineurin from pearl oyster (Pinctada fucata). Comparative Biochemistry and Physiology Part B: Biochemistry and Molecular Biology. 2009;153: 43–53.

4. Miyamoto H, Miyashita T, Okushima M, Nakano S, Morita T, Matsushiro A. A carbonic anhydrase from the nacreous layer in oyster pearls. Proceedings of the National Academy of Sciences. 1996;93: 9657–9660. doi:10.1073/pnas.93.18.9657

5. Wang X, Song X, Wang T, Zhu Q, Miao G, Chen Y, et al. Evolution and functional analysis of the Pif97 gene of the Pacific oyster Crassostrea gigas. Current Zoology. 2013;59: 109–115.

6. Huan P, Liu G, Wang H, Liu B. Identification of a tyrosinase gene potentially involved in early larval shell biogenesis of the Pacific oyster Crassostrea gigas. Dev Genes Evol. 2013;223: 389–394. doi:10.1007/s00427-013-0450-z

7. Weiss IM, Schönitzer V, Eichner N, Sumper M. The chitin synthase involved in marine bivalve mollusk shell formation contains a myosin domain. FEBS Letters. 2006;580: 1846–1852. doi:10.1016/j.febslet.2006.02.044

8. Fujimura T, Wada K, Iwaki T. Development and morphology of the pearl oyster larvae, Pinctada fucata. Japanese Journal of Malacology (Japan). 1995.

9. Kurihara H, Kato S, Ishimatsu A. Effects of increased seawater pCO2 on early development of the oyster Crassostrea gigas. Aquatic Biology. 2007;1: 91–98. doi:10.3354/ab00009

10. Li H, Li Q, Yu H, Du S. Developmental dynamics of myogenesis in Pacific oyster Crassostrea gigas. Comparative Biochemistry and Physiology Part B: Biochemistry and Molecular Biology. 2019;227: 21–30. doi:10.1016/j.cbpb.2018.08.008
